# Supplementary material for: Scalable Production of Equine Platelet Lysate for Multipotent Mesenchymal Stromal Cell Culture
Source: PubMed Central journal article supplement (PMC7859354; doi:10.3389/fbioe.2020.613621), 2021-01-21
Supplement: Data_Sheet_1.pdf [file Data_Sheet_1.pdf]

Hagen et al., Supplementary file 1:

Adapted Grogan score for semiquantitative analysis of chondrogenic differentiation

| <b>Score categories</b>                                                                                                                                                                                                                                                                                                                                                                        | <b>Score</b>     |
|------------------------------------------------------------------------------------------------------------------------------------------------------------------------------------------------------------------------------------------------------------------------------------------------------------------------------------------------------------------------------------------------|------------------|
| <b>A) Uniformity and lightblue*<sup>1</sup>/ blueish*<sup>2</sup> of Alcian blue/ Masson´s Trichrome stain</b><br>No stain<br>Weak staining of poorly formed matrix<br>Moderately even staining<br>Even strong stain                                                                                                                                                                           | 0<br>1<br>2<br>3 |
| <b>B) Distance between cells/ amount of matrix accumulated</b><br>High cell densities with no matrix in between (no spacing between cells)<br>High cell densities with little matrix in between (cells < 1 cell-size apart)<br>Moderate cell density with matrix (cells approx. 1 cell-size apart)<br>Low cell density with moderate distance between cells (> 1 cell) and an extensive matrix | 0<br>1<br>2<br>3 |
| <b>C) Cell morphologies represented</b><br>Condensed/ necrotic/ pycnotic bodies<br>Spindle/ fibrous<br>Mixed spindle/ fibrous with rounded chondrogenic morphology<br>Majority rounded/ chondrogenic                                                                                                                                                                                           | 0<br>1<br>2<br>3 |
| <b>D) % of differentiated areas of the pellet in field of view (10x magnification)</b><br>0 - 5%<br>5 - 30%<br>30 - 60%<br>60 - 100%                                                                                                                                                                                                                                                           | 0<br>1<br>2<br>3 |
| * <sup>1</sup> = Alcian blue staining<br>* <sup>2</sup> = Masson´s Trichrome staining                                                                                                                                                                                                                                                                                                          |                  |
